# Supplementary material for: Disease-modifying effects of sodium selenate in a model of drug-resistant, temporal lobe epilepsy
Source: eLife. 2023 Mar 9;12:e78877. doi: 10.7554/eLife.78877 (PMC10208637; doi:10.7554/eLife.78877)
Supplement: Supplementary file 1. [file elife-78877-supp1.xlsx]

## Sheet: Supplementary File 1
Uniprot ID	gene	f.value	p.value	FDR
Q5FVJ5	Bmerb1	41.994	2.58e-06	0.014475
F1LUV9	Ncam1	30.015	1.36e-05	0.033682
M0R3N4	Vat1l	28.312	1.8e-05	0.033682
F1M362	Golga7b	25.043	3.24e-05	0.038097
Q66HA8	Hsph1	24.795	3.39e-05	0.038097
F1LR84	Nptx2	23.721	4.18e-05	0.03894
P63086	Mapk1	22.636	5.21e-05	0.03894
O35314	Chgb	21.551	6.55e-05	0.03894
A0A1W2Q6C8	Gfap	21.186	7.09e-05	0.03894
A0A0G2K5N6	Rock2	20.927	7.5e-05	0.03894
P14659	Hspa2	20.827	7.67e-05	0.03894
A0A0G2JW68	Syt6	20.462	8.32e-05	0.03894
Q8VHJ9	nan	19.641	0.0001004	0.042078
D3ZTK0	Ttc9b	19.414	0.00010589	0.042078
P06685	Atp1a1	19.161	0.00011241	0.042078
A0A0G2K014	Lcp1	18.73	0.00012465	0.043044
Q4V7D9	Smpdl3b	18.406	0.00013489	0.043044
P02454	Col1a1	18.276	0.00013925	0.043044
D3ZDH8	Septin5	18.095	0.00014565	0.043044
P07825	Syp	17.302	0.00017808	0.049143
Q5MJ12	Fbxl16	17.083	0.00018848	0.049143
A0A096MJE6	Tnr	16.959	0.00019471	0.049143
A0A0G2K2T8	AABR07054286.1	16.832	0.0002013	0.049143
D3ZDI7	Ppp2r5a	16.666	0.00021038	0.04922
Supplementary File 1: List of proteins with significantly different relative abundance from somatosensory cortex tissue of Selenate treated animals. One-way ANOVA and Tukey's post hoc tests were conducted to identify differences between groups. FDR cutoff of 0.05 was used for the significance threshold.
