# Supplementary material for: Disease-modifying effects of sodium selenate in a model of drug-resistant, temporal lobe epilepsy
Source: eLife. 2023 Mar 9;12:e78877. doi: 10.7554/eLife.78877 (PMC10208637; doi:10.7554/eLife.78877)
Supplement: Supplementary file 2. [file elife-78877-supp2.xlsx]

## Sheet: Supplementary File 2
Uniprot ID	gene	f.value	p.value	FDR
Q0PGW2	Dennd11	61.645	3.64e-07	0.0020148
P47819	Gfap	50.306	1.03e-06	0.0028603
G3V913	Hspb1	45.606	1.7e-06	0.0031382
D3ZRN5	Ro60	28.149	1.85e-05	0.022773
G3V8C3	Vim	27.276	2.15e-05	0.022773
A0A0G2JU96	Ahnak	26.509	2.47e-05	0.022773
A0A0G2JZX9	Pde1a	24.132	3.86e-05	0.0305
A0A0G2JTL4	Kit	22.614	5.23e-05	0.036215
Q6AYC4	Capg	21.236	7.01e-05	0.043127
Supplementary File 2: List of proteins with significantly different relative abundance from hippocampal tissue of Selenate treated animals. One-way ANOVA and Tukey's post hoc tests were conducted to identify differences between groups. FDR cutoff of 0.05 was used for the significance threshold.
