# Supplementary material for: Disease-modifying effects of sodium selenate in a model of drug-resistant, temporal lobe epilepsy
Source: eLife. 2023 Mar 9;12:e78877. doi: 10.7554/eLife.78877 (PMC10208637; doi:10.7554/eLife.78877)
Supplement: Supplementary file 3. [file elife-78877-supp3.xlsx]

## Sheet: Supplementary File 3
Metabolite	F value	P value	log10Pval	FDR
[PI(18:0/20:4)] 1-octadecanoyl-2-(5Z,8Z,11Z,14Z-eicosatetraenoyl)-sn-glycero-3-phospho-(1'-myo-inositol)	21.059	7.29e-05	4.1374	0.065439
PC(36:4)	13.889	0.00046501	3.3325	0.14317
Asn-Asn-Gly	12.927	0.00063004	3.2006	0.14317
N-stearoyl tyrosine	12.365	0.00075846	3.1201	0.14317
2-Ethylhexyl phthalate	12.217	0.00079718	3.0984	0.14317
[PC(22:6)]	11.004	0.0012215	2.9131	0.14613
PS(18:2(9Z,12Z)/22:2(13Z,16Z))	10.825	0.0013046	2.8845	0.14613
myo-Inositol 4-phosphate	10.2	0.0016525	2.7819	0.14613
Neuraminic acid	9.965	0.0018107	2.7421	0.14613
Methyl (2E,6E)-(10R,11S)-10,11-epoxy-3,7,11-trimethyltrideca-2,6-dienoate	9.8858	0.0018681	2.7286	0.14613
9S,11R,15S-trihydroxy-5Z,13E-prostadienoic acid-cyclo[8S,12R]	9.8502	0.0018945	2.7225	0.14613
PS(41:6)	9.42	0.0022523	2.6474	0.14613
L-Methionine	9.325	0.0023417	2.6305	0.14613
Ala-Ala-Ala-Asn	9.316	0.0023504	2.6289	0.14613
4-Acetamidobutanoate	9.0339	0.0026428	2.5779	0.14613
Taurocyamine	8.7816	0.0029416	2.5314	0.14613
5,6-Dihydrothymine	8.7197	0.0030208	2.5199	0.14613
Guanidinoacetate	8.6759	0.0030784	2.5117	0.14613
5-Guanidino-2-oxopentanoate	8.6657	0.0030919	2.5098	0.14613
Convicine	8.3463	0.0035559	2.4491	0.15664
Ascorbate	8.2794	0.0036632	2.4361	0.15664
L-Threonine	7.9373	0.0042756	2.369	0.17452
Ascorbate 2-sulfate	7.5496	0.0051215	2.2906	0.18685
N-Acetyl-D-mannosaminolactone	7.3299	0.0056882	2.245	0.18685
LysoPE(16:0)	7.3088	0.0057465	2.2406	0.18685
PE(P-36:4)	7.2749	0.0058415	2.2335	0.18685
L-Tyrosine	7.2519	0.005907	2.2286	0.18685
L-beta-aspartyl-L-alanine	7.2082	0.0060337	2.2194	0.18685
N-Pyruvoyl-5-methoxy-3-hydroxyanthranilate	7.1619	0.0061717	2.2096	0.18685
N-Acetyllactosamine	7.0879	0.0064002	2.1938	0.18685
Argininicacid	7.072	0.0064504	2.1904	0.18685
S-Adenosyl-L-homocysteine	6.709	0.0077375	2.1114	0.21047
Mycolipanolic acid (C24)	6.6883	0.0078196	2.1068	0.21047
4-coumaroyl-3-hydroxyagmatine	6.6513	0.0079689	2.0986	0.21047
SM(d38:1)	6.4911	0.0086553	2.0627	0.22207
Thiamin	6.3828	0.0091588	2.0382	0.22846
PC(15:0)	6.2634	0.0097547	2.0108	0.23465
N-Acetyl-D-mannosamine	6.23	0.0099296	2.0031	0.23465
FA (13:2) tridecadienoic acid	6.0936	0.010683	1.9713	0.2451
3-Hydroxypropenoate	5.9977	0.011252	1.9488	0.2451
N-Acetyl-D-glucosamine 6-phosphate	5.8914	0.011927	1.9235	0.2451
Acanthicifoline	5.8798	0.012003	1.9207	0.2451
PE(22:5(4Z,7Z,10Z,13Z,16Z)/P-18:1(11Z))	5.869	0.012075	1.9181	0.2451
N2-Acetyl-L-aminoadipate	5.8359	0.012297	1.9102	0.2451
Ala-Asp-Gly	5.8126	0.012457	1.9046	0.2451
PS(14:0/0:0)	5.7984	0.012555	1.9012	0.2451
L-Asparagine	5.6602	0.013564	1.8676	0.24801
Mivacurium	5.6595	0.013569	1.8674	0.24801
PC(30:0)	5.6103	0.013951	1.8554	0.24801
L-Carnitine	5.5562	0.014386	1.8421	0.24801
Ala-Gly-Gly-Gly	5.5524	0.014416	1.8411	0.24801
N-Formimino-L-glutamate	5.5273	0.014625	1.8349	0.24801
N-Acetyl-D-glucosamine	5.4605	0.015194	1.8183	0.24801
(R)-3-Hydroxybutanoate	5.4166	0.015583	1.8074	0.24801
Ala-Asn-Gly	5.406	0.015678	1.8047	0.24801
PE(36:4)	5.4005	0.015729	1.8033	0.24801
3-Ethylmalate	5.399	0.015742	1.8029	0.24801
gamma-L-Glutamyl-L-cysteine	5.3347	0.01634	1.7868	0.24984
N-acetyl -D- glucosaminitol	5.3268	0.016415	1.7848	0.24984
L-Phenylalanine	5.2655	0.017013	1.7692	0.25397
L-Tryptophan	5.2418	0.017252	1.7632	0.25397
CMP	5.1512	0.018199	1.74	0.2572
Met-Ala-Gly	5.1424	0.018294	1.7377	0.2572
2-Oxobutanoate	5.0911	0.01886	1.7244	0.2572
PE(34:0)	5.0107	0.019791	1.7035	0.2572
FA hydroxy(10:0)	5.0014	0.019902	1.7011	0.2572
Hymexazol O-glucoside	4.9982	0.01994	1.7003	0.2572
[PS(18:0/20:4)] 1-octadecanoyl-2-(5Z,8Z,11Z,14Z-eicosatetraenoyl)-sn-glycero-3-phosphoserine	4.9919	0.020016	1.6986	0.2572
Glycyl-leucine	4.9834	0.020119	1.6964	0.2572
Cys-Lys-Thr-Thr	4.9793	0.020169	1.6953	0.2572
Glycerophosphoglycerol	4.9542	0.020477	1.6887	0.2572
Arg-OEt	4.9425	0.020623	1.6857	0.2572
Vinylacetylglycine	4.9198	0.020908	1.6797	0.2572
D-Erythrose	4.886	0.021343	1.6707	0.259
HEPES	4.8296	0.022091	1.6558	0.25946
Ala-Ala-Ser	4.8138	0.022306	1.6516	0.25946
propanesulfonate	4.8106	0.02235	1.6507	0.25946
PC(34:1)	4.7971	0.022537	1.6471	0.25946
Pyruvate	4.7206	0.023628	1.6266	0.26858
UDP-D-galactose	4.6938	0.024024	1.6193	0.26967
Pyrimidodiazepine	4.624	0.025095	1.6004	0.27238
alpha-D-Galactosyl-N-acetyllactosamine	4.6092	0.025328	1.5964	0.27238
D-Galactarate	4.6084	0.025342	1.5962	0.27238
3-Methylbutanamine	4.5998	0.025479	1.5938	0.27238
PE(P-40:4)	4.5129	0.026917	1.57	0.28292
Phe-Asn	4.4805	0.027477	1.561	0.28292
ADPribose 2'-phosphate	4.4324	0.028333	1.5477	0.28292
Ala-Phe-Asp-Tyr	4.4208	0.028545	1.5445	0.28292
Ala-Ala-Ala	4.3998	0.028932	1.5386	0.28292
Otonecine	4.3864	0.029182	1.5349	0.28292
N(pi)-Methyl-L-histidine	4.3741	0.029415	1.5314	0.28292
LysoPE(18:0)	4.3549	0.029782	1.5261	0.28292
LysoPE(22:6)	4.3483	0.029908	1.5242	0.28292
7-Methylguanine	4.3293	0.030279	1.5189	0.28292
Glu-Asp-Phe	4.3289	0.030286	1.5188	0.28292
ZAPA	4.3228	0.030407	1.517	0.28292
Urea-1-carboxylate	4.315	0.03056	1.5148	0.28292
LysoPE(20:4)	4.2855	0.031152	1.5065	0.28545
PS(22:6(4Z,7Z,10Z,13Z,16Z,19Z)/0:0)	4.2475	0.031935	1.4957	0.28967
Betaine	4.2136	0.03265	1.4861	0.2932
N-Formiminoglycine	4.1954	0.033044	1.4809	0.29379
Homoanserine	4.147	0.034114	1.4671	0.29688
PS(40:4)	4.1115	0.034927	1.4568	0.29688
Dephospho-CoA	4.1108	0.034944	1.4566	0.29688
PC(38:4)	4.1101	0.03496	1.4564	0.29688
N5-acetyl-N5-hydroxy-L-ornithine	4.1015	0.03516	1.4539	0.29688
(4R,5S)-4,5,6-Trihydroxy-2,3-dioxohexanoate	4.088	0.035477	1.4501	0.29688
Chitobiose	4.0784	0.035706	1.4473	0.29688
N-Carbamyl-L-glutamate	4.0372	0.0367	1.4353	0.30236
2-amino-2,4-penta-dienoate	3.9919	0.037835	1.4221	0.30377
Sedoheptulose	3.9916	0.037843	1.422	0.30377
Adenine	3.9861	0.037983	1.4204	0.30377
(2R,4S)-2,4-Diaminopentanoate	3.9697	0.038404	1.4156	0.30377
D-Glucose	3.9636	0.038563	1.4138	0.30377
Ala-Leu-Thr-Ala	3.9095	0.040004	1.3979	0.31238
FA (20:4)	3.865	0.041234	1.3847	0.31446
3-(Pyrazol-1-yl)-L-alanine	3.8538	0.041551	1.3814	0.31446
N-(2-hydroxy-docosanoyl)-tetradecasphing-4-enine-1-phosphoethanolamine	3.8507	0.04164	1.3805	0.31446
N4-Acetylaminobutanal	3.8391	0.041971	1.377	0.31446
5'-Methylthioadenosine	3.8374	0.042021	1.3765	0.31446
N2-(D-1-Carboxyethyl)-L-arginine	3.8183	0.042573	1.3709	0.31528
Hydantoin-5-propionate	3.7863	0.043522	1.3613	0.31528
2-Hydroxyethanesulfonate	3.7802	0.043708	1.3594	0.31528
L-Fuculose 1-phosphate	3.7794	0.04373	1.3592	0.31528
Tuberonic acid glucoside	3.7742	0.043887	1.3577	0.31528
Pinidine	3.7555	0.044458	1.3521	0.31685
D-Histidine	3.7252	0.045403	1.3429	0.32083
Ile-Thr	3.7148	0.045731	1.3398	0.32083
D-Asparagine	3.6522	0.047775	1.3208	0.3295
P-DPD	3.6461	0.04798	1.3189	0.3295
2-methylhistamine	3.6349	0.048357	1.3155	0.3295
1-Methylnicotinamide	3.6192	0.048895	1.3107	0.3295
CoA	3.6181	0.048931	1.3104	0.3295
3-Hydroxy-N6,N6,N6-trimethyl-L-lysine	3.6112	0.049168	1.3083	0.3295
Octadecanamide	3.5826	0.050173	1.2995	0.33201
DG(36:1)	3.5795	0.050282	1.2986	0.33201
GlcCer(d18:1/23:0)	3.5354	0.051878	1.285	0.33921
PE(41:4)	3.5242	0.052291	1.2816	0.33921
beta-Citryl-L-glutamic acid	3.516	0.052598	1.279	0.33921
PC(36:2)	3.4988	0.053245	1.2737	0.33921
LysoPC(16:0)	3.4984	0.053261	1.2736	0.33921
CDP-ethanolamine	3.484	0.053811	1.2691	0.3403
Ergothioneine	3.4694	0.054378	1.2646	0.34148
3,7,11,15,19,23,27,31,35,39-decamethyltetraconta-2E,6E,10E,14E,18E,22E,26E,30E,34E,38-decaen-1-yl phosphate	3.453	0.05502	1.2595	0.34311
Ile-Val	3.3915	0.057509	1.2403	0.35616
N-(6-Aminohexanoyl)-6-aminohexanoate	3.3795	0.058012	1.2365	0.35682
SM(d18:0/18:1(9Z))	3.3568	0.058975	1.2293	0.35968
Hypoxanthine	3.3391	0.059741	1.2237	0.35968
L-Lysine	3.333	0.060004	1.2218	0.35968
PE(15:0/22:1(13Z))	3.3313	0.06008	1.2213	0.35968
L-Histidine	3.3123	0.060916	1.2153	0.36032
L-Leucine	3.3107	0.06099	1.2147	0.36032
L-Rhamnose	3.292	0.061828	1.2088	0.36289
[PC(22:6)] 1-(4Z,7Z,10Z,13Z,16Z,19Z-docosahexaenoyl)-sn-glycero-3-phosphocholine	3.2794	0.062402	1.2048	0.36388
L-Citrulline	3.2491	0.063804	1.1952	0.36965
D-Glucose 6-phosphate	3.2369	0.06438	1.1912	0.37048
4-Hydroxybutanoic acid	3.2274	0.064833	1.1882	0.37048
NADH	3.2172	0.065321	1.1849	0.37048
N-Acetyl-L-glutamate 5-semialdehyde	3.2072	0.065807	1.1817	0.37048
FA methyl(12:0) dodecanoic acid	3.203	0.066011	1.1804	0.37048
FA methyl(6:0)	3.1938	0.066461	1.1774	0.37069
3-beta-D-Galactosyl-sn-glycerol	3.1775	0.067268	1.1722	0.37108
3-Methylguanine	3.175	0.067396	1.1714	0.37108
Rishitin	3.1604	0.068131	1.1667	0.37108
2-Oxoglutarate	3.1416	0.069089	1.1606	0.37108
6-oxo-9S,11R,15S-trihydroxy-13E-prostenoic acid	3.129	0.06974	1.1565	0.37108
Inumakilactone A glycoside	3.1219	0.070111	1.1542	0.37108
PE(16:0)	3.1213	0.070146	1.154	0.37108
PE(P-38:6)	3.1057	0.070966	1.149	0.37108
LysoPE(0:0/22:6(4Z,7Z,10Z,13Z,16Z,19Z))	3.0944	0.071572	1.1453	0.37108
PC(20:4)	3.0721	0.072778	1.138	0.37108
[SP (24:0)] N-(15Z-tetracosenoyl)-1-beta-glucosyl-sphinganine	3.0707	0.072856	1.1375	0.37108
Ala-Ala-Asn-Asn	3.054	0.073778	1.1321	0.37108
3-Fluoro-1-(4-hydroxyphenyl)-1-propanone	3.0515	0.073918	1.1313	0.37108
N3-hydroxyethylcytosine	3.0495	0.074029	1.1306	0.37108
N6,N6,N6-Trimethyl-L-lysine	3.0391	0.074609	1.1272	0.37108
benzenesulfonate	3.0375	0.074699	1.1267	0.37108
Creatinine	3.0282	0.075228	1.1236	0.37108
Asp-Met-Asp-Gly	3.0114	0.076189	1.1181	0.37108
L-beta-aspartyl-L-threonine	2.9916	0.077343	1.1116	0.37108
NADP+	2.9827	0.077869	1.1086	0.37108
D-Ribose	2.9747	0.078343	1.106	0.37108
UDP-N-acetyl-D-galactosamine	2.9682	0.078732	1.1038	0.37108
Ser-Arg	2.9611	0.079158	1.1015	0.37108
Choline phosphate	2.9523	0.079694	1.0986	0.37108
FA oxo(10:0)	2.9481	0.079945	1.0972	0.37108
L-Proline	2.9475	0.079983	1.097	0.37108
GDP-3,6-dideoxy-D-galactose	2.9435	0.080227	1.0957	0.37108
PE(38:6)	2.9376	0.080592	1.0937	0.37108
ADP	2.9339	0.080819	1.0925	0.37108
Glucosylceramide (d18:1/24:1(15Z))	2.9327	0.080895	1.0921	0.37108
gamma-L-Glutamyl-D-alanine	2.9327	0.080895	1.0921	0.37108
4-Imidazolone-5-propanoate	2.9243	0.081414	1.0893	0.37108
Galactosylceramide (d18:1/24:1(15Z))	2.9203	0.081667	1.088	0.37108
Cer(d36:2)	2.9195	0.081717	1.0877	0.37108
Nicotinate D-ribonucleoside	2.9127	0.082144	1.0854	0.37108
FA (8:1)	2.9089	0.082384	1.0842	0.37108
5-Oxoproline	2.9056	0.082592	1.0831	0.37108
allopurinol	2.9045	0.082658	1.0827	0.37108
2-Hydroxybutanoic acid	2.8991	0.083005	1.0809	0.37108
(S)-piperazine-2-carboxylate	2.8982	0.08306	1.0806	0.37108
3,4-Dihydroxyphenylacetate	2.8868	0.083791	1.0768	0.37132
GDP	2.8845	0.08394	1.076	0.37132
1-(beta-D-Ribofuranosyl)-1,4-dihydronicotinamide	2.8757	0.084514	1.0731	0.37182
AMP	2.87	0.084881	1.0712	0.37182
PE(38:4)	2.862	0.08541	1.0685	0.37231
Cyclic ADP-ribose	2.8499	0.086212	1.0644	0.37231
Inosine	2.8411	0.086803	1.0615	0.37231
trans-Hexadec-2-enoylcarnitine	2.8399	0.086883	1.0611	0.37231
CMP-N-trimethyl-2-aminoethylphosphonate	2.8372	0.087065	1.0602	0.37231
ATP	2.8279	0.087689	1.0571	0.3731
L-Pipecolate	2.8184	0.088343	1.0538	0.3731
Asp-Met-Cys-Tyr	2.8079	0.089061	1.0503	0.3731
Phenylpropanoate	2.8077	0.08908	1.0502	0.3731
Thiomorpholine 3-carboxylate	2.8041	0.089328	1.049	0.3731
PE(35:1)	2.7975	0.089789	1.0468	0.37329
UMP	2.7832	0.090795	1.0419	0.37354
L-Aspartate 4-semialdehyde	2.7814	0.090921	1.0413	0.37354
PE(O-38:5)	2.7789	0.091097	1.0405	0.37354
N-Acetyl-D-fucosamine	2.7575	0.092631	1.0332	0.37575
Lys-Val	2.7533	0.09294	1.0318	0.37575
NAD+	2.7508	0.093119	1.031	0.37575
D-Arabinonate	2.7482	0.093311	1.0301	0.37575
[FA methyl(4:1)] 2-methyl-2E-butenoic acid	2.7214	0.095288	1.021	0.382
N-acetyl-demethylphophinothricin	2.7156	0.095728	1.019	0.38206
2-Aminomuconate semialdehyde	2.6916	0.097548	1.0108	0.38338
1-(6-[5]-ladderane-hexanoyl)-2-(8-[3]-ladderane-octanyl)-sn-glycerol	2.6887	0.097777	1.0098	0.38338
[PI(16:0)] 1-hexadecanoyl-sn-glycero-3-phospho-(1'-myo-inositol)	2.6885	0.097791	1.0097	0.38338
4-Aminobutanoate	2.6883	0.097809	1.0096	0.38338
Oleoyl-CoA	2.6808	0.09839	1.007	0.38338
L-Homocitrulline	2.6755	0.098799	1.0052	0.38338
Ala-Ser	2.6695	0.099272	1.0032	0.38338
1-N6-ethenoadenine	2.6591	0.10009	0.99961	0.38338
Stipitatonate	2.6589	0.1001	0.99955	0.38338
2-descarboxy-cyclo-dopa	2.6561	0.10033	0.99858	0.38338
Furfural	2.636	0.10194	0.99167	0.38512
alpha-aminopimelate	2.6345	0.10206	0.99113	0.38512
4-Hydroxyphenylacetylglutamic acid	2.6344	0.10207	0.9911	0.38512
azaguanine	2.6239	0.10293	0.98747	0.38568
Octadecanoic acid	2.622	0.10308	0.98684	0.38568
L-Isoleucine	2.6086	0.10419	0.98219	0.38821
N-Acetyl-L-citrulline	2.5989	0.105	0.97883	0.38865
5'-methylthioformycin	2.5942	0.10539	0.97722	0.38865
(3R)-hydroxy-N-acetyl-(L)-arginine	2.5917	0.1056	0.97633	0.38865
Asp-Arg	2.5741	0.10709	0.97024	0.39154
D-Glucono-1,5-lactone 6-phosphate	2.5703	0.10742	0.96892	0.39154
Dihydroclavaminic acid	2.5587	0.10842	0.96487	0.39154
LysoPC(20:4)	2.5555	0.10871	0.96375	0.39154
9-Hexadecenoylcarnitine	2.5527	0.10895	0.96278	0.39154
L-Serine	2.5518	0.10903	0.96247	0.39154
(R)-piperidine-3-carboxylate	2.5315	0.11082	0.95537	0.39154
Cer(d36:1)	2.5314	0.11083	0.95534	0.39154
Nicotinamide	2.5296	0.11099	0.95473	0.39154
2-acetamidoglucal	2.5275	0.11118	0.95399	0.39154
D-Alanyl-D-alanine	2.5269	0.11123	0.95379	0.39154
CAPS	2.5226	0.11162	0.95226	0.39154
[FA (22:4)] 7Z,10Z,13Z,16Z-docosatetraenoic acid	2.51	0.11276	0.94785	0.39378
FA (18:1)	2.5059	0.11313	0.94641	0.39378
(S)-2-Aceto-2-hydroxybutanoate	2.4865	0.11492	0.9396	0.39789
Glu-Arg	2.48	0.11552	0.93733	0.39789
Pantothenate	2.469	0.11656	0.93345	0.39789
Homocarnosine	2.4686	0.1166	0.9333	0.39789
Deoxycytidine	2.4673	0.11672	0.93286	0.39789
PE(P-38:3)	2.4646	0.11698	0.93191	0.39789
3-nitro-2-pentanol	2.4595	0.11747	0.93009	0.39806
Glutathione disulfide	2.4468	0.11868	0.92563	0.39926
PE(39:4)	2.4465	0.11871	0.92551	0.39926
Botrydial	2.4388	0.11945	0.9228	0.40026
Ethanolamine phosphate	2.4335	0.11998	0.92091	0.40051
Piperidine	2.4204	0.12126	0.91628	0.4033
(S)-2-Amino-3-(3-hydroxy-4-oxo-4H-pyridin-1-yl)propanoate	2.4024	0.12306	0.90989	0.40643
D-Xylonate	2.4019	0.1231	0.90973	0.40643
Cyanidin 3-O-[2''-O-(xylosyl) 6''-O-(p-O-(glucosyl) p-coumaroyl) glucoside] 5-O-[6'''-O-(malonyl) glucoside]	2.3885	0.12446	0.90495	0.40941
Leu-Ala	2.3704	0.12633	0.89848	0.41218
GDP-mannose	2.3686	0.12652	0.89786	0.41218
PE(32:0)	2.367	0.12668	0.89729	0.41218
Taurine	2.3614	0.12727	0.89527	0.41225
N6-Acetyl-N6-hydroxy-L-lysine	2.358	0.12762	0.89407	0.41225
O-Palmitoyl-R-carnitine	2.351	0.12836	0.89156	0.41315
sn-glycero-3-Phosphocholine	2.3382	0.12972	0.887	0.4152
3,4-dehydroproline	2.3363	0.12992	0.88631	0.4152
Aspartyl-L-proline	2.3238	0.13128	0.88181	0.41676
Palmitoyl-CoA	2.3232	0.13134	0.88161	0.41676
PS(44:12)	2.3183	0.13187	0.87986	0.41697
Thr-Tyr	2.2824	0.13586	0.86692	0.42807
3-4-DihydroxyphenylglycolO-sulfate	2.2673	0.13757	0.86149	0.43194
Arecoline	2.26	0.13841	0.85884	0.43307
Coniine	2.2427	0.14042	0.85258	0.43718
D-Ribose 5-phosphate	2.2404	0.1407	0.85172	0.43718
SM(d18:1/24:0)	2.2268	0.1423	0.84678	0.43731
PA(P-42:4)	2.2267	0.14231	0.84677	0.43731
Gly-Arg	2.2265	0.14234	0.84669	0.43731
Swainsonine	2.2236	0.14269	0.84562	0.43731
Betaine aldehyde	2.2162	0.14356	0.84295	0.43783
5-methylthiopentylhydroximoyl-cysteinylglycine	2.2007	0.14544	0.83731	0.43783
N-Acetyl-aspartyl-glutamate	2.1992	0.14563	0.83675	0.43783
L-Valine	2.1941	0.14625	0.83491	0.43783
Ile-Lys	2.1939	0.14628	0.83481	0.43783
4-(Trimethylammonio)but-2-enoate	2.1923	0.14648	0.83423	0.43783
PC(32:0)	2.1903	0.14672	0.8335	0.43783
Ne,Ne dimethyllysine	2.19	0.14676	0.8334	0.43783
PE(39:1)	2.1809	0.14788	0.83009	0.43972
N6-Methyl-L-lysine	2.1689	0.14938	0.8257	0.44273
Ile-Gly-Gly	2.1517	0.15157	0.81939	0.44596
2alpha,7beta,15beta,18-tetraacetoxy-cholest-5-en-3alpha-ol	2.1497	0.15183	0.81864	0.44596
N-Acetylmethionine	2.1486	0.15197	0.81825	0.44596
Riboflavin cyclic-4',5'-phosphate	2.1324	0.15407	0.81228	0.44828
sn-glycero-3-Phosphoethanolamine	2.1311	0.15424	0.81181	0.44828
Pro-Arg	2.131	0.15425	0.81177	0.44828
DIBOA-glucoside	2.1245	0.1551	0.80939	0.44929
PS(39:4)	2.1078	0.15732	0.80322	0.45182
Glu-Thr	2.105	0.15769	0.8022	0.45182
N-Methylhexanamide	2.1048	0.15771	0.80213	0.45182
2-C-Methyl-D-erythritol 4-phosphate	2.1028	0.15799	0.80138	0.45182
5-Acetamidopentanoate	2.0893	0.1598	0.79641	0.45557
N-Acetyl-beta-alanine	2.0845	0.16045	0.79465	0.45598
3',5'-Cyclic AMP	2.072	0.16218	0.79001	0.45942
Queuine	2.0619	0.16358	0.78627	0.45996
PE(34:3)	2.0606	0.16376	0.78579	0.45996
CHAPS	2.0596	0.1639	0.78541	0.45996
N6-Acetyl-L-lysine	2.0428	0.16628	0.77916	0.46087
Val-Arg	2.0355	0.16732	0.77645	0.46087
N-stearoyl serine	2.0336	0.16759	0.77575	0.46087
beta-Alanyl-L-arginine	2.0321	0.16781	0.77519	0.46087
[PE(20:0/15:0)] 1-eicosanoyl-2-pentadecanoyl-sn-glycero-3-phosphoethanolamine	2.0275	0.16847	0.77349	0.46087
PC(42:3)	2.0261	0.16867	0.77296	0.46087
Diethanolamine	2.0226	0.16918	0.77166	0.46087
MGDG(18:2(9Z,12Z)/18:3(9Z,12Z,15Z))	2.0178	0.16988	0.76985	0.46087
Tetradecanoylcarnitine	2.0139	0.17044	0.76842	0.46087
L-Alanine	2.0081	0.17129	0.76626	0.46087
FA methyl (8:1)	2.0058	0.17164	0.76539	0.46087
PS(38:4)	1.9991	0.17263	0.76289	0.46087
Deoxymannojirimycin	1.9971	0.17293	0.76213	0.46087
sn-glycerol-1-phosphate	1.9908	0.17386	0.75979	0.46087
Pantetheine 4'-phosphate	1.9898	0.17402	0.7594	0.46087
Acetyl-CoA	1.9829	0.17507	0.7568	0.46087
GDP-L-fucose	1.9786	0.1757	0.75522	0.46087
CDP-ribitol	1.9765	0.17602	0.75443	0.46087
3,5/4-Trihydroxycyclohexa-1,2-dione	1.9719	0.17674	0.75268	0.46087
N1,N8-diacetylspermidine	1.9718	0.17675	0.75265	0.46087
9-Oxononanoic acid	1.9709	0.17688	0.75232	0.46087
N-Ribosylhistidine	1.9695	0.17709	0.75181	0.46087
[PI(20:4)] 1-(5Z,8Z,11Z,14Z-eicosatetraenoyl)-sn-glycero-3-phospho-(1'-myo-inositol)	1.9687	0.17721	0.75151	0.46087
FA hydroxy(18:1)]	1.9667	0.17753	0.75073	0.46087
Galactosylceramide (d18:1/22:0)	1.9651	0.17777	0.75013	0.46087
N-hydroxyvaline	1.9628	0.17812	0.74928	0.46087
&alpha;-(2,6-anhydro-3-deoxy-D-arabino-heptulopyranosid)onate 7-phosphate	1.9597	0.1786	0.74813	0.46087
[SP (24:0)] N-(tetracosanoyl)-1-beta-glucosyl-sphing-4-enine	1.9593	0.17867	0.74795	0.46087
gamma-Undecalactone	1.9564	0.17912	0.74687	0.46087
PS(44:10)	1.9479	0.18043	0.74369	0.46183
O-Acetylcarnitine	1.9474	0.18052	0.74348	0.46183
PIPES	1.935	0.18247	0.73881	0.4642
Coprine	1.9348	0.18249	0.73876	0.4642
4-Trimethylammoniobutanoate	1.9317	0.18299	0.73756	0.4642
3-Dehydroxycarnitine	1.9263	0.18384	0.73555	0.46505
5-Dehydro-4-deoxy-D-glucarate	1.913	0.18598	0.73053	0.46713
PC(32:1)	1.9123	0.1861	0.73026	0.46713
Guanosine	1.9115	0.18623	0.72996	0.46713
Phe-Arg	1.907	0.18696	0.72826	0.46731
FA hydroxy(7:0)	1.9025	0.18769	0.72656	0.46731
2-Amino-7,8-dihydro-4-hydroxy-6-(diphosphooxymethyl)pteridine	1.9015	0.18786	0.72616	0.46731
N6-(L-1,3-Dicarboxypropyl)-L-lysine	1.8961	0.18874	0.72413	0.46752
PE(18:3(6Z,9Z,12Z)/P-18:1(11Z))	1.8946	0.18899	0.72357	0.46752
Cer(d-h 35:0)	1.8902	0.18972	0.72188	0.46783
2-Methylcholine	1.8869	0.19027	0.72063	0.46783
O-Propanoylcarnitine	1.8813	0.19119	0.71853	0.46783
UDP	1.8813	0.1912	0.71852	0.46783
L-Cysteate	1.8707	0.19297	0.7145	0.4709
Asp-Gln	1.8665	0.19369	0.7129	0.47136
N3-(4-methoxyfumaroyl)-L-2,3-diaminopropanoate	1.8615	0.19455	0.71098	0.47217
formiminoalanine	1.8522	0.19613	0.70745	0.47361
IMP	1.8518	0.19619	0.70732	0.47361
[PR] Vitamin E	1.848	0.19686	0.70584	0.47394
L-Lathyrine	1.8434	0.19765	0.70411	0.47456
Hydroxyhexanoycarnitine	1.8349	0.19913	0.70086	0.47537
D-Sedoheptulose 7-phosphate	1.832	0.19964	0.69975	0.47537
Asn-Met-Gln-Ser	1.829	0.20016	0.69863	0.47537
2,5-Dioxopentanoate	1.8277	0.20039	0.69812	0.47537
Sulfate	1.8246	0.20093	0.69695	0.47537
glycerophosphoserine	1.8234	0.20116	0.69646	0.47537
(S)-Malate	1.8137	0.20288	0.69276	0.47818
4-Guanidinobutanoate	1.8032	0.20477	0.68873	0.48118
Oleoylcarnitine	1.8006	0.20523	0.68777	0.48118
Ganglioside GD3 (d18:1/18:0)	1.7815	0.20872	0.68043	0.48811
PC(35:4)	1.7725	0.21039	0.67698	0.48976
N6-Acetyl-LL-2,6-diaminoheptanedioate	1.7707	0.21073	0.67628	0.48976
Mescaline	1.7689	0.21106	0.67558	0.48976
N-Acetyl-L-2-amino-6-oxopimelate	1.7634	0.21209	0.67347	0.49087
Succinyladenosine	1.7507	0.2145	0.66857	0.4932
NADPH	1.7503	0.21458	0.66842	0.4932
PC(40:2)	1.7468	0.21525	0.66706	0.4932
Citrate	1.7465	0.21529	0.66697	0.4932
PI(38:4)	1.74	0.21654	0.66447	0.49337
Phytuberin	1.7398	0.21659	0.66436	0.49337
L-Aspartate	1.7375	0.21702	0.6635	0.49337
(R)-piperazine-2-carboxylate	1.7347	0.21757	0.66241	0.49337
2,3-Diaminosalicylic acid	1.7301	0.21847	0.66062	0.49416
4-Methylene-L-glutamate	1.7228	0.21987	0.65783	0.49609
Glu-Met-Met	1.711	0.22221	0.65323	0.49664
5-Methyl-2'-deoxycytidine	1.7057	0.22326	0.65119	0.49664
&gamma;-aminobutyramide	1.705	0.22341	0.65091	0.49664
(2R,4R)-1,2,7,7-tetramethylbicyclo[2.2.1]heptan-2-ol	1.7038	0.22363	0.65046	0.49664
Thiamin monophosphate	1.7007	0.22426	0.64924	0.49664
Acetylpyruvate	1.7002	0.22437	0.64904	0.49664
Sarmentosin epoxide	1.6974	0.22492	0.64798	0.49664
[PR] bacteriohopane-,32,33,34-triol-35-cyclitolguanine	1.695	0.22539	0.64706	0.49664
3'-CMP	1.6941	0.22559	0.64669	0.49664
Daminozide	1.6914	0.22613	0.64565	0.49664
Val-Val	1.6911	0.2262	0.64551	0.49664
Xanthosine	1.684	0.22763	0.64276	0.49857
N-Nonanoylglycine	1.679	0.22866	0.64082	0.49959
sn-glycero-3-Phospho-1-inositol	1.6658	0.23138	0.63568	0.50431
N-Undecanoylglycine	1.6617	0.23221	0.63411	0.50435
TG(45:4)	1.6603	0.23252	0.63354	0.50435
Phosphocreatine	1.6546	0.23371	0.63132	0.50571
FA hydroxy(8:0) hydroxy-octanoic acid	1.6517	0.23431	0.63021	0.50574
Arg-Glu-Ile-Phe	1.6475	0.23519	0.62859	0.50574
L-2-Amino-3-oxobutanoic acid	1.6463	0.23545	0.62809	0.50574
Gamma-Aminobutyryl-lysine	1.6431	0.23613	0.62685	0.50574
3-Butynoate	1.6407	0.23664	0.6259	0.50574
L-Hypoglycin	1.6381	0.23719	0.6249	0.50574
PC(33:1)	1.6309	0.23873	0.62209	0.50574
Asp-Cys-Cys-Ser	1.6277	0.23942	0.62083	0.50574
S-Adenosyl-L-methionine	1.6204	0.241	0.61799	0.50574
D-myo-Inositol 1,2-cyclic phosphate	1.6199	0.24111	0.61779	0.50574
[FA (6:0)] hexanal	1.6195	0.24121	0.61761	0.50574
DG(38:5)	1.6159	0.24199	0.6162	0.50574
PS(18:0/18:1(9Z))	1.6118	0.24288	0.61461	0.50574
Ala-Asp-Cys	1.6101	0.24325	0.61396	0.50574
PE(35:0)	1.6085	0.24359	0.61333	0.50574
PC(34:0)	1.6068	0.24398	0.61264	0.50574
Crotonoside	1.6067	0.24399	0.61263	0.50574
FA methyl(8:0)	1.6064	0.24406	0.6125	0.50574
His-Phe-Phe-Pro	1.6048	0.24442	0.61186	0.50574
Lys-Met-Phe-Phe	1.601	0.24525	0.61039	0.50629
N-(2-hydroxy-tetracosanoyl)-hexadecasphing-4-enine-1-phosphoethanolamine	1.5985	0.24582	0.60939	0.50629
Ethyl (R)-3-hydroxybutanoate	1.5923	0.2472	0.60695	0.50798
Mannitol	1.5886	0.24802	0.60552	0.50849
Glycerol	1.586	0.2486	0.6045	0.50853
Kurilensoside G	1.582	0.2495	0.60292	0.50921
PE(22:1(13Z)/15:0)	1.5762	0.25082	0.60064	0.51073
dAMP	1.5649	0.25339	0.59621	0.51129
[PA(16:0/0:0)] 1-hexadecanoyl-2-sn-glycero-3-phosphate	1.5635	0.25372	0.59565	0.51129
Acetyl phosphate	1.5628	0.25388	0.59537	0.51129
N2-Succinyl-L-ornithine	1.5592	0.25471	0.59395	0.51129
PC(42:10)	1.5587	0.25483	0.59374	0.51129
N6-(1,2-Dicarboxyethyl)-AMP	1.5578	0.25505	0.59338	0.51129
D-Ribulose 5-phosphate	1.5576	0.25507	0.59333	0.51129
3-Methylbutanoic acid	1.5456	0.25788	0.58858	0.51576
PC(31:1)	1.5411	0.25893	0.58682	0.5167
amiclenomycin	1.5275	0.26215	0.58145	0.52098
GalCer(d18:2/23:0)	1.5272	0.26224	0.5813	0.52098
PS(O-36:2)	1.5226	0.26332	0.57951	0.52098
L-isoleucyl-L-proline	1.5206	0.26381	0.57871	0.52098
Boc-Asn	1.5199	0.26397	0.57845	0.52098
D-Gluconic acid	1.5158	0.26497	0.5768	0.52181
Guanine	1.5025	0.2682	0.57155	0.527
N-Acetylcystathionine	1.4892	0.27147	0.56627	0.5315
Tetradecanoic acid	1.4884	0.27167	0.56596	0.5315
L-Canaline	1.4828	0.27306	0.56374	0.53205
[PC(14:0/18:0)] 1-tetradecanoyl-2-octadecanoyl-sn-glycero-3-phosphocholine	1.4784	0.27417	0.56198	0.53205
Glucosylceramide (d18:1/22:0)	1.4734	0.27542	0.56	0.53205
1-Aminocyclopentanecarboxylate	1.473	0.27553	0.55983	0.53205
5-diazo-4-oxo-norvaline	1.4707	0.27613	0.55889	0.53205
O-Butanoylcarnitine	1.469	0.27654	0.55825	0.53205
2-5-Furandicarboxylicacid	1.463	0.27807	0.55585	0.53205
CAI-1	1.4617	0.27841	0.55531	0.53205
N-Carboxyethyl-g-aminobutyricacid	1.4609	0.2786	0.55501	0.53205
PA(O-33:1)	1.4608	0.27863	0.55498	0.53205
N-Acetyl-O-acetylneuraminate	1.459	0.27909	0.55425	0.53205
4-methylhistamine	1.4573	0.27953	0.55357	0.53205
PE(P-40:6)	1.455	0.28011	0.55267	0.53205
Pirbuterol	1.4545	0.28024	0.55247	0.53205
[SP] Sphing-4-enine-1-phosphate	1.4473	0.28211	0.54958	0.53404
7-Hydroxy-3-(4-methoxyphenyl)-4-propyl-2H-1-benzopyran-2-one	1.4431	0.28319	0.54792	0.53404
2,7-Anhydro-alpha-N-acetylneuraminic acid	1.4414	0.28364	0.54723	0.53404
2-Oxoglutaramate	1.4413	0.28367	0.54719	0.53404
FA hydroxy(9:0) hydroxy-nonanoic acid	1.4312	0.28631	0.54316	0.53788
L-2,4-Diaminobutanoate	1.4274	0.28732	0.54164	0.53814
Glutathione	1.4261	0.28765	0.54114	0.53814
6-methyltetrahydropterin	1.4205	0.28915	0.53888	0.53982
Ile-Ala-Gly	1.4181	0.28978	0.53793	0.53988
LysoPE(18:1)	1.4088	0.29227	0.53422	0.54304
2,3-Dimethylmaleate	1.4063	0.29296	0.53319	0.54304
PE(43:6)	1.4031	0.29381	0.53194	0.54304
Ala-Phe-Tyr-Tyr	1.4011	0.29436	0.53112	0.54304
PC(38:6)	1.4006	0.2945	0.53092	0.54304
gamma-Amino-gamma-cyanobutanoate	1.3958	0.29582	0.52898	0.54435
Dihydrobiopterin	1.3845	0.29891	0.52446	0.54745
sodium dodecyl sulfate	1.3823	0.29952	0.52357	0.54745
FA (8:0) octanoic acid	1.3822	0.29953	0.52355	0.54745
L-beta-aspartyl-L-leucine	1.3808	0.29994	0.52297	0.54745
Arachidonyl-CoA	1.377	0.30098	0.52147	0.54823
L-beta-aspartyl-L-glutamicacid	1.3719	0.30242	0.51939	0.54975
PE(39:2)	1.3697	0.30304	0.51851	0.54975
3-Methyl-2-oxobutanoic acid	1.3606	0.30558	0.51487	0.55218
[SP] (3'-sulfo)Galbeta-Cer(d42:2)	1.3604	0.30565	0.51477	0.55218
FA hydroxy(6:0)	1.3558	0.30695	0.51294	0.55218
LysoPE(22:4)	1.3554	0.30707	0.51276	0.55218
4-Guanidinobutanal	1.3541	0.30745	0.51223	0.55218
PE(19:0)	1.3446	0.31016	0.50841	0.55594
(S)-piperazine-2-carboxamide	1.3388	0.31184	0.50606	0.55754
6-diazo-5-oxonorleucine	1.3317	0.31388	0.50323	0.55754
[ST hydrox] 3alpha,7alpha-Dihydroxy-5beta-cholan-24-oic Acid	1.3314	0.31397	0.50311	0.55754
Gamma-Glutamylglutamine	1.3294	0.31456	0.5023	0.55754
2-Hydroxyethylphosphonate	1.3278	0.31504	0.50163	0.55754
sn-Glycerol 3-phosphate	1.3266	0.3154	0.50114	0.55754
Homoarginine	1.3236	0.31626	0.49996	0.55754
[FA amino(14:0)] 2-amino-tetradecanoic acid	1.323	0.31644	0.49971	0.55754
S-Acetyldihydrolipoamide	1.3223	0.31664	0.49943	0.55754
Lys-Gly-Pro-Pro	1.3126	0.31953	0.49549	0.56043
PS(O-20:0/0:0)	1.3126	0.31953	0.49549	0.56043
[FA trihydroxy(4:0)] 2,3,4-trihydroxy-butanoic acid	1.2999	0.32332	0.49037	0.56507
Glucosylceramide	1.2995	0.32344	0.49021	0.56507
FA (20:1)	1.2916	0.32582	0.48702	0.56813
D-Glucono-1,5-lactone	1.289	0.32663	0.48594	0.56813
FA oxo(7:0)	1.2875	0.32709	0.48534	0.56813
Turgorin	1.2761	0.33057	0.48073	0.57308
&gamma;-glutamyl-L-alaninol	1.2713	0.33206	0.47878	0.57455
FA (17:0)	1.2673	0.33331	0.47715	0.57543
(3R)-oct-1-en-3-ol	1.2655	0.33386	0.47643	0.57543
Hexose phosphate	1.2619	0.33499	0.47496	0.57543
Bis(2-ethylhexyl)phthalate	1.2593	0.33581	0.4739	0.57543
CDP-choline	1.2575	0.3364	0.47315	0.57543
3-Guanidinopropanoate	1.2574	0.33642	0.47312	0.57543
SM(d34:1)	1.2539	0.33752	0.4717	0.57623
3-Dehydroquinate	1.2416	0.34141	0.46672	0.58069
Ile-Ser	1.2416	0.34143	0.4667	0.58069
Methylimidazole acetaldehyde	1.2354	0.34342	0.46417	0.58297
3,5,7-Trimethyl-2E,4E,6E,8E-undecatetraene	1.2303	0.34505	0.46211	0.58323
[SP] (3'-sulfo)Galbeta-Cer(d18:1/24:1(15Z))	1.2297	0.34526	0.46185	0.58323
Decanoic acid	1.2289	0.34552	0.46153	0.58323
FA(16:1)	1.2223	0.34765	0.45886	0.58509
PC(40:6)	1.2215	0.34793	0.45851	0.58509
Fibrin	1.2164	0.3496	0.45643	0.58681
Hexanoylcarnitine	1.2128	0.35077	0.45498	0.58766
1-O-Methyl-myo-inositol	1.201	0.35469	0.45015	0.59273
Glu-Glu	1.1996	0.35515	0.44959	0.59273
5-6-Dihydrouridine	1.1977	0.35577	0.44883	0.59273
1-(4-amino-2-methylpyrimid-5-ylmethyl)-3-(&beta;-hydroxyethyl)-2-methylpyridinium bromide	1.1925	0.35752	0.4467	0.59454
chromate	1.1898	0.35845	0.44557	0.59499
Uracil	1.1831	0.36071	0.44284	0.59687
Ala-Pro	1.1825	0.36091	0.4426	0.59687
LysoPE(0:0/20:4(5Z,8Z,11Z,14Z))	1.1798	0.36183	0.4415	0.59728
[PE(16:1)] 1-(1Z-hexadecenyl)-sn-glycero-3-phosphoethanolamine	1.1726	0.36428	0.43856	0.60023
N-Methyltyramine	1.1673	0.36613	0.43637	0.60089
PA(O-36:2)	1.1661	0.36651	0.43591	0.60089
Ile-Arg	1.1647	0.367	0.43534	0.60089
PE(P-42:0)	1.1637	0.36736	0.43491	0.60089
PS(34:1)	1.1569	0.36972	0.43213	0.60235
Ganglioside GM2 (d36:1)	1.1543	0.37061	0.43108	0.60235
FA (9:2) nonadienoic acid	1.1474	0.37304	0.42825	0.60235
trans-4-Hydroxycyclohexanecarboxylate	1.1464	0.37339	0.42784	0.60235
1-(3-aminopropyl)-4-aminobutanal	1.1451	0.37385	0.42731	0.60235
D-Fructose 1,6-bisphosphate	1.1451	0.37386	0.4273	0.60235
PG(38:4)	1.1418	0.37504	0.42593	0.60235
Barbiturate	1.1416	0.37508	0.42587	0.60235
(-)-Camphor	1.138	0.37638	0.42438	0.60235
[SP] (3'-sulfo)Galbeta-Cer(dOH-42:1)	1.1364	0.37696	0.42371	0.60235
ADP-ribose	1.1359	0.37712	0.42352	0.60235
PS(P-37:2)	1.1358	0.37716	0.42347	0.60235
Dodecanoylcarnitine	1.1319	0.37857	0.42186	0.60235
D-Erythrose 4-phosphate	1.1286	0.37975	0.4205	0.60235
L-Arginine	1.1267	0.38041	0.41975	0.60235
PC(P-38:0)	1.125	0.38103	0.41904	0.60235
N-(docosanoyl)-sphinganine-1-phospho-(1'-myo-inositol)	1.1234	0.3816	0.4184	0.60235
7-oxoheptanoate	1.1219	0.38213	0.41779	0.60235
11'-Carboxy-alpha-chromanol	1.1217	0.38223	0.41767	0.60235
(S)-Lactate	1.1209	0.38251	0.41736	0.60235
Adenosine	1.1208	0.38253	0.41734	0.60235
D-Glutamate	1.1195	0.38301	0.41679	0.60235
Orthophosphate	1.1096	0.38663	0.4127	0.60698
Ile-Asn	1.1052	0.38825	0.41089	0.60846
8-Hydroxypurine	1.1013	0.38967	0.4093	0.60963
Hydroxypyruvate	1.0993	0.3904	0.40849	0.60971
1-butanesulfonate	1.0915	0.3933	0.40528	0.61316
3-deoxy-D-galactose	1.089	0.39425	0.40422	0.61359
Leu-Ser	1.0823	0.39674	0.40149	0.61639
L-threonine amide	1.0776	0.39852	0.39955	0.61767
Ile-Ala	1.0742	0.3998	0.39815	0.61767
N-Acetyl-D-glucosamine 4-sulfate	1.0726	0.40043	0.39747	0.61767
Galegine	1.0714	0.40086	0.39701	0.61767
PS(O-36:1)	1.0711	0.401	0.39685	0.61767
Embelin	1.0644	0.40353	0.39413	0.62049
Urocanate	1.0577	0.4061	0.39136	0.62264
PA(38:4)	1.0568	0.40646	0.39099	0.62264
Cytidine	1.0534	0.40778	0.38957	0.62264
Thymine	1.049	0.4095	0.38775	0.62264
1-Methyl-4-phenyl-1,2,3,6-tetrahydropyridine N-oxide	1.0462	0.41057	0.38661	0.62264
1,2-Dihydroxymint lactone	1.0456	0.41083	0.38634	0.62264
Ala-Thr-Ala-Ser	1.045	0.41103	0.38612	0.62264
Pentanamide	1.0447	0.41116	0.38599	0.62264
Eugenol methyl ether	1.0447	0.41117	0.38598	0.62264
(R)-2-Hydroxyglutarate	1.0395	0.4132	0.38384	0.62314
Acetylenedicarboxylate	1.0388	0.41349	0.38354	0.62314
PE(15:0/20:0)	1.0385	0.41358	0.38344	0.62314
octulose 8-phosphate	1.0364	0.41443	0.38255	0.62338
PE(42:2)	1.0322	0.41607	0.38083	0.62411
[ST (3:0)] 26-O-[beta-D-glucopyranosyl]-25R-furostan-3beta,22alpha,26-triol	1.0316	0.4163	0.38059	0.62411
N-&alpha;-L-histidine	1.0272	0.41805	0.37877	0.62569
FA (14:2) tetradecadienal	1.0243	0.41921	0.37756	0.62638
N-(2-hydroxy-tetracosanoyl)-1-beta-glucosyl-tetradecasphing-4-enine	1.0204	0.42077	0.37595	0.62679
N-&alpha;-acetyl lysine methyl ester	1.0201	0.42089	0.37583	0.62679
N-acetyl-(L)-arginine	1.0163	0.42241	0.37427	0.62705
DG(32:0)	1.0162	0.42246	0.37422	0.62705
XDP	1.0138	0.42343	0.37322	0.62746
Orotate(Fragment)	1.0093	0.42526	0.37134	0.62913
(1R,2S)-1-Hydroxypropane-1,2,3-tricarboxylate	1.0063	0.42647	0.37011	0.62954
PA(34:1)	1.0046	0.42714	0.36943	0.62954
(1-Ribosylimidazole)-4-acetate	1.0026	0.42797	0.36859	0.62954
SM(d36:1)	1.0017	0.42834	0.36821	0.62954
N-Formyl-L-methionine	0.99748	0.43006	0.36647	0.63003
L-Homocysteic acid	0.996	0.43067	0.36586	0.63003
perchlorate	0.99574	0.43078	0.36575	0.63003
Leu-Pro	0.98801	0.43396	0.36255	0.63365
FA oxo(9:0) oxo-nonanoic acid	0.98492	0.43524	0.36127	0.63449
Graphinone	0.97689	0.43858	0.35795	0.63784
Isonicotineamide	0.976	0.43896	0.35758	0.63784
[FA tetramethyl(4:0/11:0/2:0)] 2,2,9,9-tetramethyl-undecan-1,10-diol	0.96728	0.44262	0.35397	0.64212
Muscimol	0.9641	0.44397	0.35265	0.64304
PS(36:1)	0.9554	0.44767	0.34904	0.6453
3-Phospho-D-glycerate	0.9545	0.44805	0.34867	0.6453
PE(40:6)	0.95382	0.44835	0.34839	0.6453
Carnosine	0.95367	0.44841	0.34833	0.6453
PE(34:1)	0.94904	0.45039	0.34641	0.64713
N3-methylcytosine	0.94653	0.45148	0.34537	0.64733
Poly-N-acetyllactosamine	0.9445	0.45235	0.34453	0.64733
Brunfelsamidine	0.94117	0.45379	0.34315	0.64733
Deoxyadenosine	0.94117	0.45379	0.34315	0.64733
SM(d16:1/20:0)	0.9389	0.45477	0.3422	0.64733
Isoamyl formate	0.93639	0.45587	0.34116	0.64733
N-Acetylglutamine	0.93597	0.45605	0.34099	0.64733
FAD	0.93538	0.4563	0.34074	0.64733
beta-Alanyl-L-lysine	0.93106	0.45819	0.33895	0.64898
Thr-Arg	0.92514	0.46079	0.33649	0.65001
GMP	0.92412	0.46124	0.33607	0.65001
N-Acetyl-L-histidine	0.92367	0.46144	0.33588	0.65001
1-Hexadecylthio-2-hexadecanoylamino-1,2-dideoxy-sn-glycero-3- phosphocholine	0.92188	0.46223	0.33514	0.65001
S-2,3-dicarboxyaziridine	0.91886	0.46357	0.33389	0.65001
L-Ornithine	0.91835	0.46379	0.33368	0.65001
4-Toluenesulfonamide	0.91675	0.4645	0.33301	0.65001
Glycylproline	0.91629	0.46471	0.33282	0.65001
5-exo-Hydroxy-1,2-campholide	0.91387	0.46578	0.33182	0.6505
Sucrose	0.91198	0.46662	0.33103	0.65066
4-Methyl-2-oxopentanoate	0.90997	0.46752	0.3302	0.65079
3-Oxopropanoate	0.90771	0.46853	0.32926	0.65079
D-Mycinose	0.90691	0.46889	0.32893	0.65079
Allysine	0.90276	0.47075	0.32721	0.65237
Phosphodimethylethanolamine	0.89999	0.472	0.32606	0.65256
[SP] (3'-sulfo)Galbeta-Cer(d18:0/2-OH-24:0)	0.89923	0.47234	0.32574	0.65256
PI(38:6)	0.89311	0.47511	0.3232	0.65538
S-carboxymethyl-D-cysteine	0.88646	0.47814	0.32044	0.65855
trans-Aconitate	0.88434	0.47912	0.31956	0.65888
DG(38:4)	0.87735	0.48233	0.31666	0.66193
Ala-Gly-Pro	0.8763	0.48281	0.31622	0.66193
FA (22:5)	0.87312	0.48428	0.3149	0.66212
Peonidin	0.87123	0.48516	0.31411	0.66212
PI(40:6)	0.87122	0.48516	0.31411	0.66212
N-Stearoylsphingosine	0.86885	0.48626	0.31313	0.66262
3-(Uracil-1-yl)-L-alanine	0.86476	0.48817	0.31143	0.66421
Asn-Lys-Asn-Pro	0.86279	0.48909	0.31061	0.66445
L-Albizziine	0.85948	0.49064	0.30923	0.66556
(1R,4S)-fenchan-2-one	0.85789	0.49139	0.30857	0.66557
2-Hydroxymalonate	0.85452	0.49297	0.30718	0.6667
L-Dehydroascorbate	0.85221	0.49407	0.30621	0.66718
2-Hydroxyadenine	0.84175	0.49903	0.30187	0.67287
Hypotaurine	0.83831	0.50068	0.30044	0.67408
Asn-Met-Gln-Pro	0.83224	0.5036	0.29792	0.67699
alpha-Methylstyrene	0.82707	0.50609	0.29577	0.67913
SM(d40:1)	0.82581	0.5067	0.29525	0.67913
Succinate	0.81463	0.51215	0.2906	0.6848
N2-Acetyl-L-lysine	0.81257	0.51316	0.28975	0.6848
[PR] (+)-Bornane-2,5-dione	0.81245	0.51322	0.2897	0.6848
D-Mannonate	0.80751	0.51565	0.28765	0.68702
PS(15:0)	0.79579	0.52146	0.28278	0.69374
PC(P-40:0)	0.7929	0.5229	0.28158	0.69463
Monomethyl sulfate	0.78637	0.52618	0.27886	0.69718
[FA (10:0/2:0)] Decanedioic acid	0.78598	0.52638	0.2787	0.69718
Urate	0.77831	0.53025	0.27552	0.70127
TG(48:5)	0.77501	0.53193	0.27415	0.70173
Ganglioside GM3 (d18:1/18:0)	0.77433	0.53227	0.27387	0.70173
[PS(18:1)] 1-(9Z-octadecenoyl)-sn-glycero-3-phosphoserine	0.77301	0.53294	0.27332	0.70173
PC(17:0/14:1)	0.76738	0.53582	0.27098	0.70449
Uridine	0.76357	0.53777	0.2694	0.70602
N-Sulfo-D-glucosamine	0.76159	0.53879	0.26858	0.70633
L-histidine hydroxamate	0.75458	0.54241	0.26567	0.71004
3-ureidoacrylate	0.74816	0.54575	0.26301	0.71337
Pyrophosphate	0.7426	0.54865	0.2607	0.71612
PC(P-33:1)	0.74	0.55002	0.25962	0.71686
Retronecine	0.73543	0.55242	0.25773	0.71895
Proacaciberin	0.73019	0.55519	0.25556	0.72049
Anhydrotetracycline	0.73016	0.55521	0.25555	0.72049
LysoPC(18:0)	0.72192	0.55959	0.25213	0.72315
L-2,3-Diaminopropanoate	0.7212	0.55997	0.25183	0.72315
DG(34:1)	0.71885	0.56123	0.25086	0.72315
Nalpha-Methylhistidine	0.71826	0.56155	0.25061	0.72315
N1-Methyl-2-pyridone-5-carboxamide	0.71763	0.56188	0.25035	0.72315
O-Acetyl-L-homoserine	0.71725	0.56209	0.25019	0.72315
5-Methylcytidine	0.71278	0.56449	0.24834	0.7252
FA oxo(8:0) oxo-octanoic acid	0.70592	0.56819	0.2455	0.72891
PE(P-38:2)	0.70033	0.57123	0.24319	0.73176
2'-O-Methyladenosine	0.69865	0.57214	0.2425	0.73188
N-carbamoylglycine	0.69589	0.57365	0.24135	0.73207
3-(4-Hydroxyphenyl)lactate	0.69423	0.57456	0.24067	0.73207
DG(44:11)	0.69391	0.57473	0.24054	0.73207
3-Deoxy-D-manno-octulosonate 8-phosphate	0.68755	0.57822	0.23791	0.73547
LysoPC(16:1(9Z))	0.68462	0.57984	0.23669	0.73584
2-Aminoacrylate	0.6831	0.58068	0.23607	0.73584
Ngamma-Monomethyl-L-arginine	0.68088	0.58191	0.23515	0.73584
SM(d18:1/18:0)	0.68077	0.58197	0.2351	0.73584
a Cysteine adduct	0.67961	0.58261	0.23462	0.73584
N-Acetyl-L-aspartate	0.67424	0.58559	0.2324	0.73795
N-Acetylneuraminate	0.67365	0.58592	0.23216	0.73795
PC(o-44:5)	0.66642	0.58996	0.22918	0.742
FA (18:2)	0.66061	0.59323	0.22678	0.74506
[PA(16:0/18:1)] 1-hexadecanoyl-2-(11Z-octadecenoyl)-sn-glycero-3-phosphate	0.65669	0.59544	0.22516	0.7468
FA hydroxy(12:1)	0.65106	0.59863	0.22284	0.74757
[FA (11:0)] undecanoic acid	0.64903	0.59978	0.222	0.74757
PA(36:4)	0.64859	0.60004	0.22182	0.74757
PS(38:1)	0.64843	0.60013	0.22176	0.74757
Ganglioside GM1 (18:1/9Z-18:1)	0.64749	0.60066	0.22137	0.74757
FA (8:1) octenal	0.64681	0.60105	0.22109	0.74757
Deoxyuridine	0.63153	0.60982	0.2148	0.75742
hexanesulfonate	0.62832	0.61168	0.21348	0.75868
Glycerone phosphate	0.62291	0.61481	0.21126	0.76141
Pseudouridine	0.6216	0.61558	0.21072	0.76141
Asp-Pro-Pro-Tyr	0.6189	0.61715	0.20961	0.7621
4-Hydroxyhexan-3-one	0.61775	0.61782	0.20914	0.7621
Hydroxybutyrylcarnitine	0.61283	0.62071	0.20711	0.7646
L-Glutamine	0.60972	0.62253	0.20584	0.76486
PS(40:6)	0.60957	0.62262	0.20578	0.76486
Cys-Cys-Gly-Tyr	0.60555	0.62498	0.20413	0.76672
N-Methylhistamine	0.6024	0.62685	0.20284	0.76772
2-isocapryloyl-3R-hydroxymethyl-&gamma;-butyrolactone	0.60124	0.62754	0.20236	0.76772
Hydroxymethylphosphonate	0.59984	0.62837	0.20179	0.76772
FA methyl(14:0)	0.59812	0.62938	0.20108	0.76792
PC(o-22:0/20:4(8Z,11Z,14Z,17Z))	0.59148	0.63334	0.19836	0.77093
PE(P-36:1)	0.59044	0.63396	0.19794	0.77093
PS(16:0/22:1(11Z))	0.58966	0.63443	0.19762	0.77093
Tetraethylammonium	0.58702	0.63601	0.19654	0.7718
Imidazole-4-methanol	0.58273	0.63858	0.19478	0.77388
PS(O-34:0)	0.57923	0.64068	0.19336	0.77538
PE(41:6)	0.57456	0.6435	0.19145	0.77775
3-ketothreonine	0.57181	0.64517	0.19033	0.77871
Octylamine	0.57003	0.64625	0.1896	0.77897
N-Carbamoylsarcosine	0.567	0.64809	0.18836	0.77973
[SP (22:0)] N-(docosanoyl)-1-beta-glucosyl-sphinganine	0.56614	0.64861	0.18801	0.77973
SM(d37:1)	0.55435	0.65582	0.18321	0.78702
Orotate	0.55336	0.65643	0.18281	0.78702
PA(P-35:2)	0.54877	0.65926	0.18094	0.78928
PC(42:2)	0.54735	0.66013	0.18037	0.78928
[FA amino(4:0)] 2-amino-4-cyano-butanoic acid	0.54603	0.66095	0.17983	0.78928
1-(3,4-dimethoxylphenyl)ethane-1,2-diol	0.54186	0.66354	0.17814	0.79131
Benzimidazole	0.54043	0.66442	0.17756	0.79131
[FA (18:1)] 9Z-octadecenamide	0.5377	0.66612	0.17645	0.79228
[LysoPC(16:2)] 1-hexadecyl-sn-glycero-3-phosphocholine	0.53526	0.66763	0.17546	0.79254
Linoleamide	0.53451	0.6681	0.17516	0.79254
5-Hydroxyindoleacetate	0.5181	0.67839	0.16852	0.80369
N4-(Acetyl-beta-D-glucosaminyl)asparagine	0.51434	0.68077	0.167	0.80457
L-cycloserine	0.51191	0.68231	0.16602	0.80457
PE(18:1)	0.51032	0.68332	0.16538	0.80457
Glu-Cys-Gly	0.51008	0.68347	0.16528	0.80457
Fagomine	0.50984	0.68362	0.16519	0.80457
Methylisoeugenol	0.50493	0.68674	0.16321	0.8063
PC(P-36:1)	0.5047	0.68689	0.16312	0.8063
Dodecanoic acid	0.50221	0.68847	0.16211	0.80667
D-Arabitol	0.5014	0.68899	0.16178	0.80667
FA (14:1)nonanoic acid	0.49509	0.69303	0.15925	0.80871
GlcCer(d18:2/23:0)	0.495	0.69308	0.15921	0.80871
Ophthalmicacid	0.49304	0.69434	0.15843	0.80871
cis-5-Tetradecenoylcarnitine	0.49182	0.69513	0.15794	0.80871
Glutarylcarnitine	0.49164	0.69524	0.15786	0.80871
PC(18:0)	0.48293	0.70085	0.15437	0.81317
[SP (18:0)] N-(octadecanoyl)-sphing-4-enine	0.48288	0.70089	0.15435	0.81317
3-O-Sulfogalactosylceramide(d18	0.4776	0.70431	0.15224	0.81427
PE(37:1)	0.47751	0.70436	0.15221	0.81427
2-Hydroxy-2,4-pentadienoate	0.47657	0.70497	0.15183	0.81427
Methylenediurea	0.47581	0.70546	0.15153	0.81427
PE(36:2)	0.46881	0.71002	0.14873	0.81848
N-hydroxyisoleucine	0.46581	0.71198	0.14753	0.81899
Elaidamide	0.46455	0.7128	0.14703	0.81899
2-O-Methylcytosine	0.46298	0.71383	0.14641	0.81899
Aminomalonate	0.46183	0.71458	0.14595	0.81899
5'-deoxy-5'-fluoroadenosine	0.46116	0.71502	0.14568	0.81899
Erythronicacid	0.45963	0.71602	0.14507	0.81909
Hexadecanoic acid	0.45025	0.72219	0.14135	0.8251
2alpha-Methyl-17beta-[(tetrahydro-2H-pyran-2-yl)oxy]-5alpha- androstan-3-one	0.44663	0.72458	0.13991	0.82678
Homostachydrine	0.44408	0.72626	0.1389	0.82765
PI(36:4)	0.44201	0.72763	0.13809	0.82789
FA amino(18:0)	0.44098	0.72832	0.13768	0.82789
Tetranor-PGE1	0.43875	0.7298	0.1368	0.82852
Glucosylceramide (d18:1/20:0)	0.43602	0.73161	0.13572	0.82871
2-AminoAMP	0.43571	0.73181	0.1356	0.82871
[FA (16:2)] N-hexadecyl-ethanolamine	0.43298	0.73363	0.13452	0.82973
Picolinamide	0.42722	0.73748	0.13225	0.83302
L-proline amide	0.42581	0.73842	0.1317	0.83304
PIP(38:4)	0.42203	0.74095	0.13021	0.83413
PC(O-42:6)	0.42029	0.74211	0.12953	0.83413
Choline	0.42021	0.74217	0.1295	0.83413
PC(42:7)	0.41643	0.74471	0.12802	0.83593
PC(36:1)	0.41279	0.74715	0.12659	0.83763
LysoPC(18:1)	0.41002	0.74902	0.12551	0.83868
&beta;-cyano-L-alanine	0.40607	0.75168	0.12397	0.84033
Iminoaspartate	0.40399	0.75309	0.12315	0.84033
2-(alpha-Hydroxyethyl)thiamine diphosphate	0.40367	0.7533	0.12303	0.84033
2,3,6-Trihydroxypyridine	0.39719	0.75769	0.12051	0.84418
17beta-Hydroxy-6beta-methyl-5alpha-androstan-3-one propionate	0.39269	0.76075	0.11876	0.84653
Cimifugin	0.3797	0.7696	0.11374	0.85532
Slaframine	0.37687	0.77154	0.11264	0.85618
2-Methylbutyroylcarnitine	0.37545	0.7725	0.1121	0.85618
(R)-AMAA	0.3744	0.77323	0.11169	0.85618
L-Histidinol	0.3707	0.77576	0.11027	0.85792
L-Methionine S-oxide	0.36607	0.77894	0.1085	0.86038
DG(P-32:1)	0.36293	0.7811	0.10729	0.86171
Acetylcholine	0.3588	0.78394	0.10572	0.86365
CL(20:2(11Z,14Z)/18:2(9Z,12Z)/18:2(9Z,12Z)/18:2(9Z,12Z))	0.35643	0.78558	0.10481	0.86365
Lotaustralin	0.35618	0.78575	0.10472	0.86365
[PI(18:1)] 1-(9Z-octadecenoyl)-sn-glycero-3-phospho-(1'-myo-inositol)	0.35265	0.78819	0.10337	0.86527
PS(38:2)	0.35005	0.78998	0.10238	0.86618
[PG (18:1)] 1-(9E-octadecenoyl)-sn-glycero-3-phospho-(1'-sn-glycerol)	0.34538	0.79321	0.10061	0.868
PC(18:1)	0.34486	0.79357	0.10041	0.868
Ile-Lys-Pro	0.33826	0.79814	0.09792	0.87194
SM(d18:0/18:1(11Z))	0.3335	0.80144	0.09613	0.8734
Propanoyl phosphate	0.33311	0.80171	0.095984	0.8734
N-Acetylornithine	0.33211	0.8024	0.095607	0.8734
PE(O-36:3)	0.32955	0.80418	0.094644	0.87371
LysoPC(20:1)	0.32891	0.80463	0.094404	0.87371
Formylpyruvate	0.32397	0.80806	0.092556	0.87638
[FA oxo(8:1)] 5-oxo-7-octenoic acid	0.31745	0.8126	0.090123	0.87957
5,6-Dihydrouracil	0.31693	0.81296	0.089929	0.87957
aminoacrylate	0.3152	0.81417	0.089287	0.87981
3-Amino-2-piperidone	0.30856	0.8188	0.086824	0.88359
6-Phospho-D-gluconate	0.30736	0.81963	0.086381	0.88359
PG(42:10)	0.29477	0.82842	0.081748	0.892
dihydrothymidine	0.28674	0.83404	0.078815	0.89696
FMN	0.27868	0.83967	0.075892	0.90147
PE(P-34:1)	0.27787	0.84024	0.075598	0.90147
[SP] (3'-sulfo)Galbeta-Cer(d18:0/2-OH-22:0)	0.27286	0.84373	0.073795	0.90414
L-Glutamate methylester	0.265	0.84922	0.070978	0.90888
N-Acetyl-beta-D-glucosaminylamine	0.26272	0.85082	0.070164	0.90888
PA(40:2)	0.26135	0.85178	0.069675	0.90888
3-(2-propenoic acid)-4,6-hydroxy cyclohexa-2,5-dienone	0.26074	0.8522	0.069458	0.90888
PG(34:1)	0.25856	0.85372	0.068683	0.90942
PE(P-40:0)	0.25493	0.85625	0.067398	0.91104
3-Methoxy-4-hydroxyphenylethyleneglycolsulfate	0.23433	0.87058	0.06019	0.92444
Procollagen 5-(D-galactosyloxy)-L-lysine	0.23385	0.87091	0.060026	0.92444
1-(14-methyl-pentadecanoyl)-2-(8-[3]-ladderane-octanyl)-sn-glycerol	0.22625	0.87618	0.057408	0.92893
PC(18:2)	0.21918	0.88106	0.054996	0.93301
dCDP-ethanolamine	0.21571	0.88345	0.053818	0.93355
PE(36:1)	0.21542	0.88365	0.05372	0.93355
PC(40:1)	0.21108	0.88663	0.052258	0.9356
CMP-N-acetylneuraminate	0.20046	0.8939	0.048712	0.94216
Pyridoxamine phosphate	0.19318	0.89885	0.046314	0.94627
Ectoine	0.18538	0.90413	0.043771	0.94793
PS(36:2)	0.18457	0.90467	0.043509	0.94793
[SP] (3'-sulfo)Galbeta-Cer(d18:1/22:0)	0.18334	0.9055	0.043113	0.94793
PC(42:5)	0.1801	0.90768	0.042069	0.94793
3-Ketosphingosine	0.1799	0.90781	0.042006	0.94793
7-Methyladenine	0.17955	0.90804	0.041895	0.94793
PC(P-36:2)	0.17811	0.90901	0.041432	0.94793
Proclavaminic acid	0.17804	0.90905	0.041412	0.94793
Bendiocarb	0.17297	0.91244	0.039798	0.94793
PS(42:4)	0.17288	0.9125	0.039769	0.94793
2-Methylcitrate	0.16832	0.91553	0.038328	0.94793
porphyrin-ring	0.16728	0.91622	0.038001	0.94793
Hexanoic acid	0.16673	0.91658	0.03783	0.94793
SM(d18:1/24:1(15Z))	0.16562	0.91731	0.037482	0.94793
N-Acetyl-L-glutamate	0.1653	0.91753	0.037382	0.94793
PE(P-36:2)	0.16516	0.91762	0.037339	0.94793
Phosphonoacetaldehyde	0.16402	0.91837	0.036982	0.94793
Miserotoxin	0.15802	0.92231	0.035124	0.9498
UDP-glucuronate	0.15765	0.92255	0.035011	0.9498
DG(38:6)	0.15641	0.92336	0.034628	0.9498
2-Aminomalonate semialdehyde	0.15452	0.92459	0.03405	0.94998
CL(18:2(9Z,12Z)/18:2(9Z,12Z)/18:2(9Z,12Z)/16:1(9Z))	0.14313	0.93195	0.030609	0.95585
Methylimidazoleacetic acid	0.14222	0.93252	0.030341	0.95585
Ile-Lys-Ser	0.14069	0.9335	0.029886	0.95585
2-oxobut-3-enanoate	0.13848	0.9349	0.029233	0.9562
methiin	0.13505	0.93707	0.028226	0.95733
cis-Aconitate	0.1319	0.93906	0.027307	0.95827
Linamarin	0.12701	0.94211	0.0259	0.96013
5-Hydroxypentanoate	0.12553	0.94302	0.025477	0.96013
PS(42:8)	0.11895	0.94707	0.023619	0.96178
Isovalerylcarnitine	0.11867	0.94724	0.02354	0.96178
Cyanidin 3,5,3'-tri-O-glucoside	0.11765	0.94786	0.023257	0.96178
L-threo-isocitrate	0.11568	0.94905	0.022709	0.96191
1-(8-[5]-ladderane-octanoyl)-2-(8-[3]-ladderane-octanyl)-sn-glycerol	0.093947	0.96181	0.016909	0.9728
[SP amino(18:0/2:0)] 2S-aminooctadecane-1,3R-diol	0.092768	0.96248	0.016608	0.9728
3-Cyano-L-alanine	0.09176	0.96305	0.016351	0.9728
Methacholine	0.086838	0.9658	0.015114	0.97448
[PE(18:0/22:6)] 1-octadecanoyl-2-(4Z,7Z,10Z,13Z,16Z,19Z-docosahexaenoyl)-sn-glycero-3-phosphoethanolamine	0.083936	0.96739	0.014397	0.97499
PE(P-38:4)	0.073392	0.97303	0.011876	0.97957
3-Methylamino-L-alanine	0.07038	0.97458	0.01118	0.98004
penem CGP31608	0.05592	0.98171	0.008018	0.9861
6-methyl-H2-pterin	0.050842	0.98405	0.0069824	0.98735
Imidazole-4-acetate	0.038771	0.98923	0.004701	0.99061
N-Formyl-L-aspartate	0.038103	0.9895	0.0045829	0.99061
Stearoylcarnitine	0.012229	0.99803	0.00085441	0.99803
Supplementary File 3: List of ALL metabolites from univariate analysis of untargeted metabolomics data from somatosensory cortex tissue of Selenate treated animals. No metabolites showed significantly different (FDR<0.05) relative abundance between the groups according to one-way ANOVA and Tukey's post hoc test.
