# Supplementary material for: Disease-modifying effects of sodium selenate in a model of drug-resistant, temporal lobe epilepsy
Source: eLife. 2023 Mar 9;12:e78877. doi: 10.7554/eLife.78877 (PMC10208637; doi:10.7554/eLife.78877)
Supplement: Supplementary file 4. [file elife-78877-supp4.xlsx]

## Sheet: Supplementary File 4
Metabolite	F value	P value	log10Pval	FDR	PubChem ID
PA(40:2)	41.19	2.841e-06	5.5465	0.0025001	52929451
[SP] (3'-sulfo)Galbeta-Cer(d18:0/2-OH-24:0)	27.385	2.1123e-05	4.6752	0.0092941	5459389
N-Acetyl-D-mannosaminolactone	23.195	4.6472e-05	4.3328	0.013632	440115
PIPES	18.395	0.00013524	3.8689	0.029753	79723
PC(42:5)	16.474	0.00022147	3.6547	0.038978	52923145
CL(20:2(11Z,14Z)/18:2(9Z,12Z)/18:2(9Z,12Z)/18:2(9Z,12Z))	15.394	0.00029834	3.5253	0.043757	53480396
Supplementary File 4: List metabolites with significantly different relative abundance from hippocampal tissue of Selenate treated animals. One-way ANOVA and Tukey's post hoc test were conducted to identify differences between groups. FDR cutoff of 0.05 was used for the significance threshold.
